# Supplementary material for: Microbial community composition in the rhizosphere of Larix decidua under different light regimes with additional focus on methane cycling microorganisms
Source: PubMed Central journal article supplement (PMC7749151; doi:10.1038/s41598-020-79143-y), 2020-12-18
Supplement: 41598_2020_79143_MOESM1_ESM.pdf [file 41598_2020_79143_MOESM1_ESM.pdf]

# **Microbial community composition in the rhizosphere of *Larix decidua* under different light regimes with additional focus on methane cycling microorganisms**

**Nadine Praeg<sup>a\*</sup> and Paul Illmer<sup>a</sup>**

<sup>a</sup>Universität Innsbruck, Department of Microbiology, Technikerstrasse 25d, A-6020 Innsbruck, Austria

\*Corresponding author: Nadine Praeg

## **Supplementary Information**

**Supplementary Information Fig. S1-S7**

**Supplementary Information Table S1+S2**

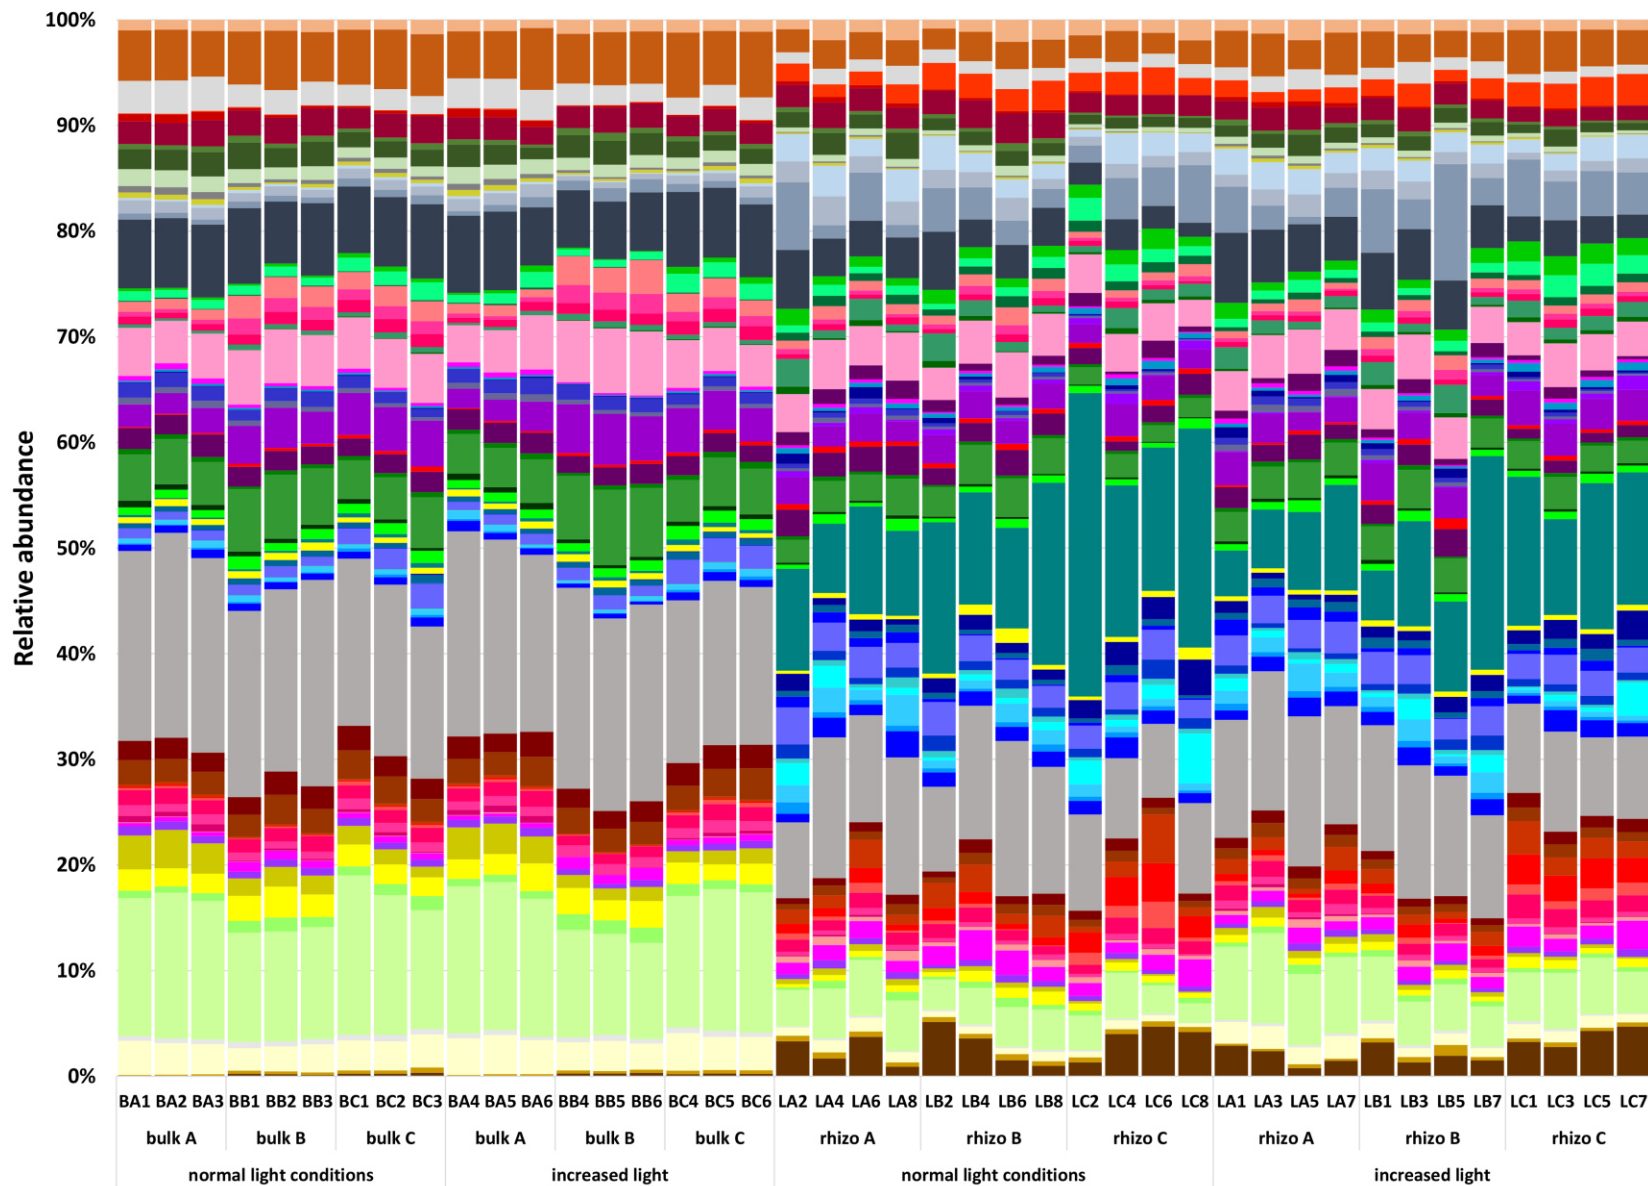

**Figure S1:** Community composition of prokaryotes on genus level representing most abundant genera (98% of relative abundance) in bulk and rhizosphere (rhizo) soils at normal and increased light conditions. A,B,C represent the replicate forest sites. BA, BB, BC stand for bulk soils on site replicate A, B and C. LA, LB, LC stand for rhizosphere soil of *L. decidua* (L) on site replicate A, B and C.

| Phylum                             | Class                            | Order                                    | Family                                   | Genus                            |                                          |                                 |
|------------------------------------|----------------------------------|------------------------------------------|------------------------------------------|----------------------------------|------------------------------------------|---------------------------------|
| <b>Verrucomicrobia</b>             | Subdivision3                     | Subdivision3 unclassified                | Subdivision3 unclassified                | Subdivision3 unclassified        |                                          |                                 |
|                                    | Spartobacteria                   | Spartobacteria unclassified              | Spartobacteria unclassified              | Spartobacteria unclassified      |                                          |                                 |
|                                    | Proteobacteria unclassified      | Proteobacteria unclassified              | Proteobacteria unclassified              | Proteobacteria unclassified      |                                          |                                 |
| <b>Proteobacteria</b>              | Gammaproteobacteria              | Xanthomonadales                          | Sinobacteraceae                          | <i>Steroidobacter</i> spp.       |                                          |                                 |
|                                    |                                  | Gammaproteobacteria unclassified         | Gammaproteobacteria unclassified         | Sinobacteraceae unclassified     |                                          |                                 |
|                                    | Deltaproteobacteria              | Myxococcales                             | Polyangiaceae                            | Gammaproteobacteria unclassified | Gammaproteobacteria unclassified         |                                 |
|                                    |                                  |                                          | Myxococcales unclassified                | Polyangiaceae unclassified       | Polyangiaceae unclassified               |                                 |
|                                    | Betaproteobacteria               | Deltaproteobacteria unclassified         | Rhodocyclales                            | Rhodocyclaceae                   | Myxococcales unclassified                |                                 |
|                                    |                                  |                                          | Nitrosomonadales                         | Nitrosomonadaceae                | Deltaproteobacteria unclassified         |                                 |
|                                    |                                  | Burkholderiales                          | Comamonadaceae                           | Rhodocyclaceae unclassified      | Rhodocyclaceae unclassified              |                                 |
|                                    |                                  |                                          | Burkholderiaceae                         | Burkholderiaceae unclassified    | <i>Nitrospira</i> spp.                   |                                 |
|                                    | Alphaproteobacteria              | Betaproteobacteria unclassified          | Sphingomonadales                         | Sphingomonadaceae                | Comamonadaceae unclassified              |                                 |
|                                    |                                  |                                          |                                          | Burkholderia spp.                | Burkholderiaceae unclassified            |                                 |
|                                    |                                  | Rhodospirillales                         | Rhodospirillales unclassified            | Rhodospirillaceae                | Betaproteobacteria unclassified          | Betaproteobacteria unclassified |
|                                    |                                  |                                          |                                          | Reyranella                       | Sphingomonadaceae unclassified           | <i>Sphingomonas</i> spp.        |
|                                    |                                  |                                          |                                          | Acetobacteraceae                 | Rhodospirillaceae unclassified           | Sphingomonadaceae unclassified  |
|                                    |                                  |                                          |                                          | Xanthobacteraceae                | Reyranella unclassified                  | <i>Rhizorhabdus</i> spp.        |
|                                    |                                  | Rhizobiales                              | Rhizobiales unclassified                 | Rhizobiaceae                     | Acetobacteraceae unclassified            | Rhodospirillales unclassified   |
|                                    |                                  |                                          |                                          | Phyllobacteriaceae               | <i>Labrys</i> spp.                       | Rhodospirillaceae unclassified  |
|                                    |                                  |                                          |                                          | Hypomicrobiaceae                 | Rhizobiales unclassified                 | Reyranella unclassified         |
| Bradyrhizobiaceae                  |                                  |                                          |                                          | <i>Rhizobium</i> spp.            | Acetobacteraceae unclassified            |                                 |
| Caulobacteraceae                   | Phyllobacteriaceae unclassified  |                                          |                                          | <i>Labrys</i> spp.               |                                          |                                 |
| Alphaproteobacteria unclassified   | Alphaproteobacteria unclassified |                                          |                                          | Rhizobiales unclassified         |                                          |                                 |
| <b>Planctomycetes</b>              | Planctomycetia                   | Planctomycetales                         | Planctomycetaceae                        | <i>Rhizobium</i> spp.            |                                          |                                 |
|                                    |                                  |                                          | Planctomycetaceae unclassified           | Planctomycetaceae unclassified   | <i>Mesorhizobium</i> spp.                |                                 |
| <b>Gemmatimonadetes</b>            | Gemmatimonadetes                 | Gemmatimonadales                         | Gemmatimonadaceae                        | <i>Rhodomicrobium</i> spp.       |                                          |                                 |
| <b>Candidatus Saccharibacteria</b> | Candidatus Saccharibacteria      | Candidatus Saccharibacteria unclassified | Candidatus Saccharibacteria unclassified | <i>Pedomicrobium</i> spp.        |                                          |                                 |
| <b>Candidate division WPS-1</b>    | Candidate division WPS-1         | Candidate division WPS-1 unclassified    | Candidate division WPS-1 unclassified    | <i>Hyphomicrobium</i> spp.       |                                          |                                 |
| <b>Bacteroidetes</b>               | Sphingobacteria                  | Sphingobacteriales                       | Sphingobacteriaceae                      | <i>Devosia</i> spp.              |                                          |                                 |
|                                    |                                  |                                          | Chitinophagaceae                         | <i>Bradyrhizobium</i> spp.       |                                          |                                 |
|                                    | Flavobacteriia                   | Flavobacteriales                         | Cytophagales                             | Cryomorpaceae                    | <i>Phenylobacterium</i> spp.             |                                 |
|                                    |                                  |                                          |                                          | Ohtaekwangia                     | Alphaproteobacteria unclassified         |                                 |
|                                    |                                  |                                          |                                          | Cytophagaceae                    | <i>Singulisphaera</i> spp.               |                                 |
|                                    |                                  |                                          |                                          | Chryseolinea                     | Planctomycetaceae unclassified           |                                 |
|                                    | Cytophagia                       | Bacteroidetes unclassified               | Bacteroidetes unclassified               | Bacteroidetes unclassified       | <i>Pirellula</i> spp.                    |                                 |
|                                    |                                  |                                          |                                          | Bacteroidetes unclassified       | <i>Gemmatimonas</i> spp.                 |                                 |
|                                    | <b>Bacteria unclassified</b>     | Bacteria unclassified                    | Bacteria unclassified                    | Bacteria unclassified            | Candidatus Saccharibacteria unclassified |                                 |
|                                    | <b>Actinobacteria</b>            | Actinobacteria                           | Actinobacteria unclassified              | Actinobacteria unclassified      | Candidate division WPS-1 unclassified    |                                 |
| Gaiellales                         |                                  |                                          |                                          | Gaiellales                       | <i>Mucilaginibacter</i> spp.             |                                 |
| Actinomycetales                    |                                  |                                          |                                          | Streptomycetaceae                | <i>Terrimonas</i> spp.                   |                                 |
| Actinobacteria unclassified        |                                  | Actinobacteria unclassified              | Actinobacteria unclassified              | Nocardoidaceae                   | <i>Ferruginibacter</i> spp.              |                                 |
|                                    |                                  |                                          |                                          | Mycobacteriaceae                 | Chitinophagaceae unclassified            |                                 |
|                                    |                                  |                                          |                                          | Micromonosporaceae               | <i>Chitinophaga</i> spp.                 |                                 |
|                                    |                                  |                                          |                                          | Microbacteriaceae                | <i>Fluviicola</i> spp.                   |                                 |
|                                    |                                  |                                          |                                          | Actinospicaceae                  | Ohtaekwangia unclassified                |                                 |
| Actinobacteria unclassified        |                                  | Actinobacteria unclassified              | Actinobacteria unclassified              | Actinomycetales unclassified     | Cytophagaceae unclassified               |                                 |
|                                    |                                  |                                          |                                          | Actinomycetales unclassified     | Chryseolinea unclassified                |                                 |
|                                    |                                  |                                          |                                          | Actinomycetales unclassified     | Bacteroidetes unclassified               |                                 |
| <b>Acidobacteria</b>               | Acidobacteria Gp17               | Acidobacteria Gp16                       | Acidobacteria Gp17 unclassified          | Bacteria unclassified            |                                          |                                 |
|                                    |                                  |                                          |                                          | Acidobacteria Gp16 unclassified  | Actinobacteria unclassified              |                                 |
|                                    |                                  |                                          |                                          | Acidobacteria Gp7 unclassified   | Gaiella spp.                             |                                 |
|                                    |                                  |                                          |                                          | Acidobacteria Gp6 unclassified   | Streptomycetaceae unclassified           |                                 |
|                                    |                                  |                                          |                                          | Acidobacteria Gp5 unclassified   | <i>Streptomyces</i> spp.                 |                                 |
|                                    |                                  |                                          |                                          | Acidobacteria Gp4 unclassified   | <i>Kribbella</i> spp.                    |                                 |
|                                    |                                  |                                          |                                          | Granulicella unclassified        | <i>Mycobacterium</i> spp.                |                                 |
|                                    |                                  |                                          |                                          | Acidobacteria Gp1 unclassified   | Micromonosporaceae unclassified          |                                 |
|                                    |                                  |                                          |                                          | Acidobacteria Gp1 unclassified   | <i>Agromyces</i> spp.                    |                                 |
|                                    |                                  |                                          |                                          | Acidobacteria Gp1 unclassified   | <i>Actinospica</i> spp.                  |                                 |
| Acidobacteria Gp1 unclassified     | Actinomycetales unclassified     |                                          |                                          |                                  |                                          |                                 |
| Acidobacteria Gp1 unclassified     | Actinomycetales unclassified     |                                          |                                          |                                  |                                          |                                 |
| Acidobacteria Gp17 unclassified    | Acidimicrobiales unclassified    |                                          |                                          |                                  |                                          |                                 |
| Acidobacteria Gp16 unclassified    | Acidimicrobiales unclassified    |                                          |                                          |                                  |                                          |                                 |
| Acidobacteria Gp7 unclassified     | Acidimicrobiales unclassified    |                                          |                                          |                                  |                                          |                                 |
| Acidobacteria Gp6 unclassified     | Acidimicrobiales unclassified    |                                          |                                          |                                  |                                          |                                 |
| Acidobacteria Gp5 unclassified     | Acidimicrobiales unclassified    |                                          |                                          |                                  |                                          |                                 |
| Acidobacteria Gp4 unclassified     | Acidimicrobiales unclassified    |                                          |                                          |                                  |                                          |                                 |
| Acidobacteria Gp1 unclassified     | Acidimicrobiales unclassified    |                                          |                                          |                                  |                                          |                                 |

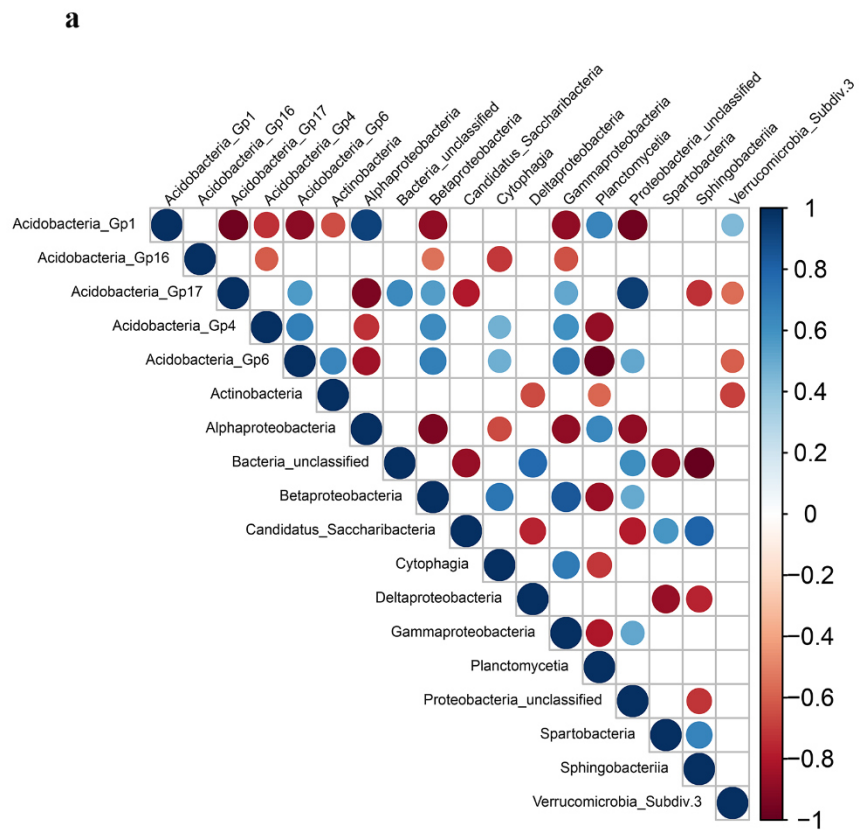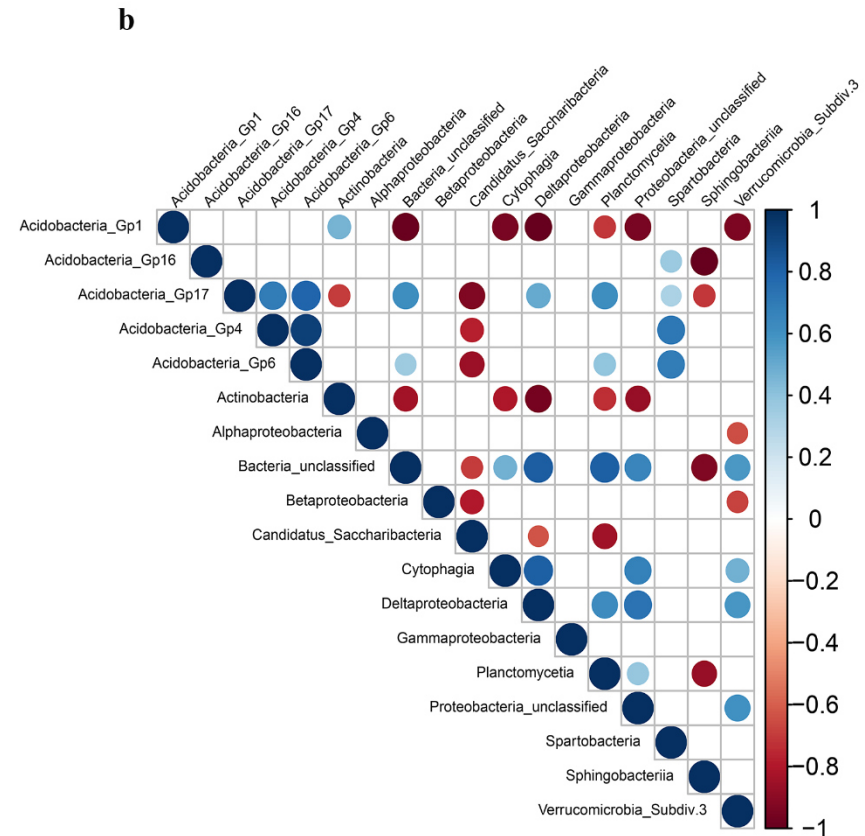

**Figure S2:** Spearman's rank correlation matrix of bacterial classes in bulk (a) and rhizosphere (b) soils. Strong correlations are indicated by large circles and weak correlations are indicated by small circles. The colours of the scale bar denote the nature of the correlation with 1 indicating perfect positive correlation (dark blue) and -1 indicating perfect negative correlation (dark red) between two bacterial classes. Only significant correlations are shown ( $p < 0.05$ ).

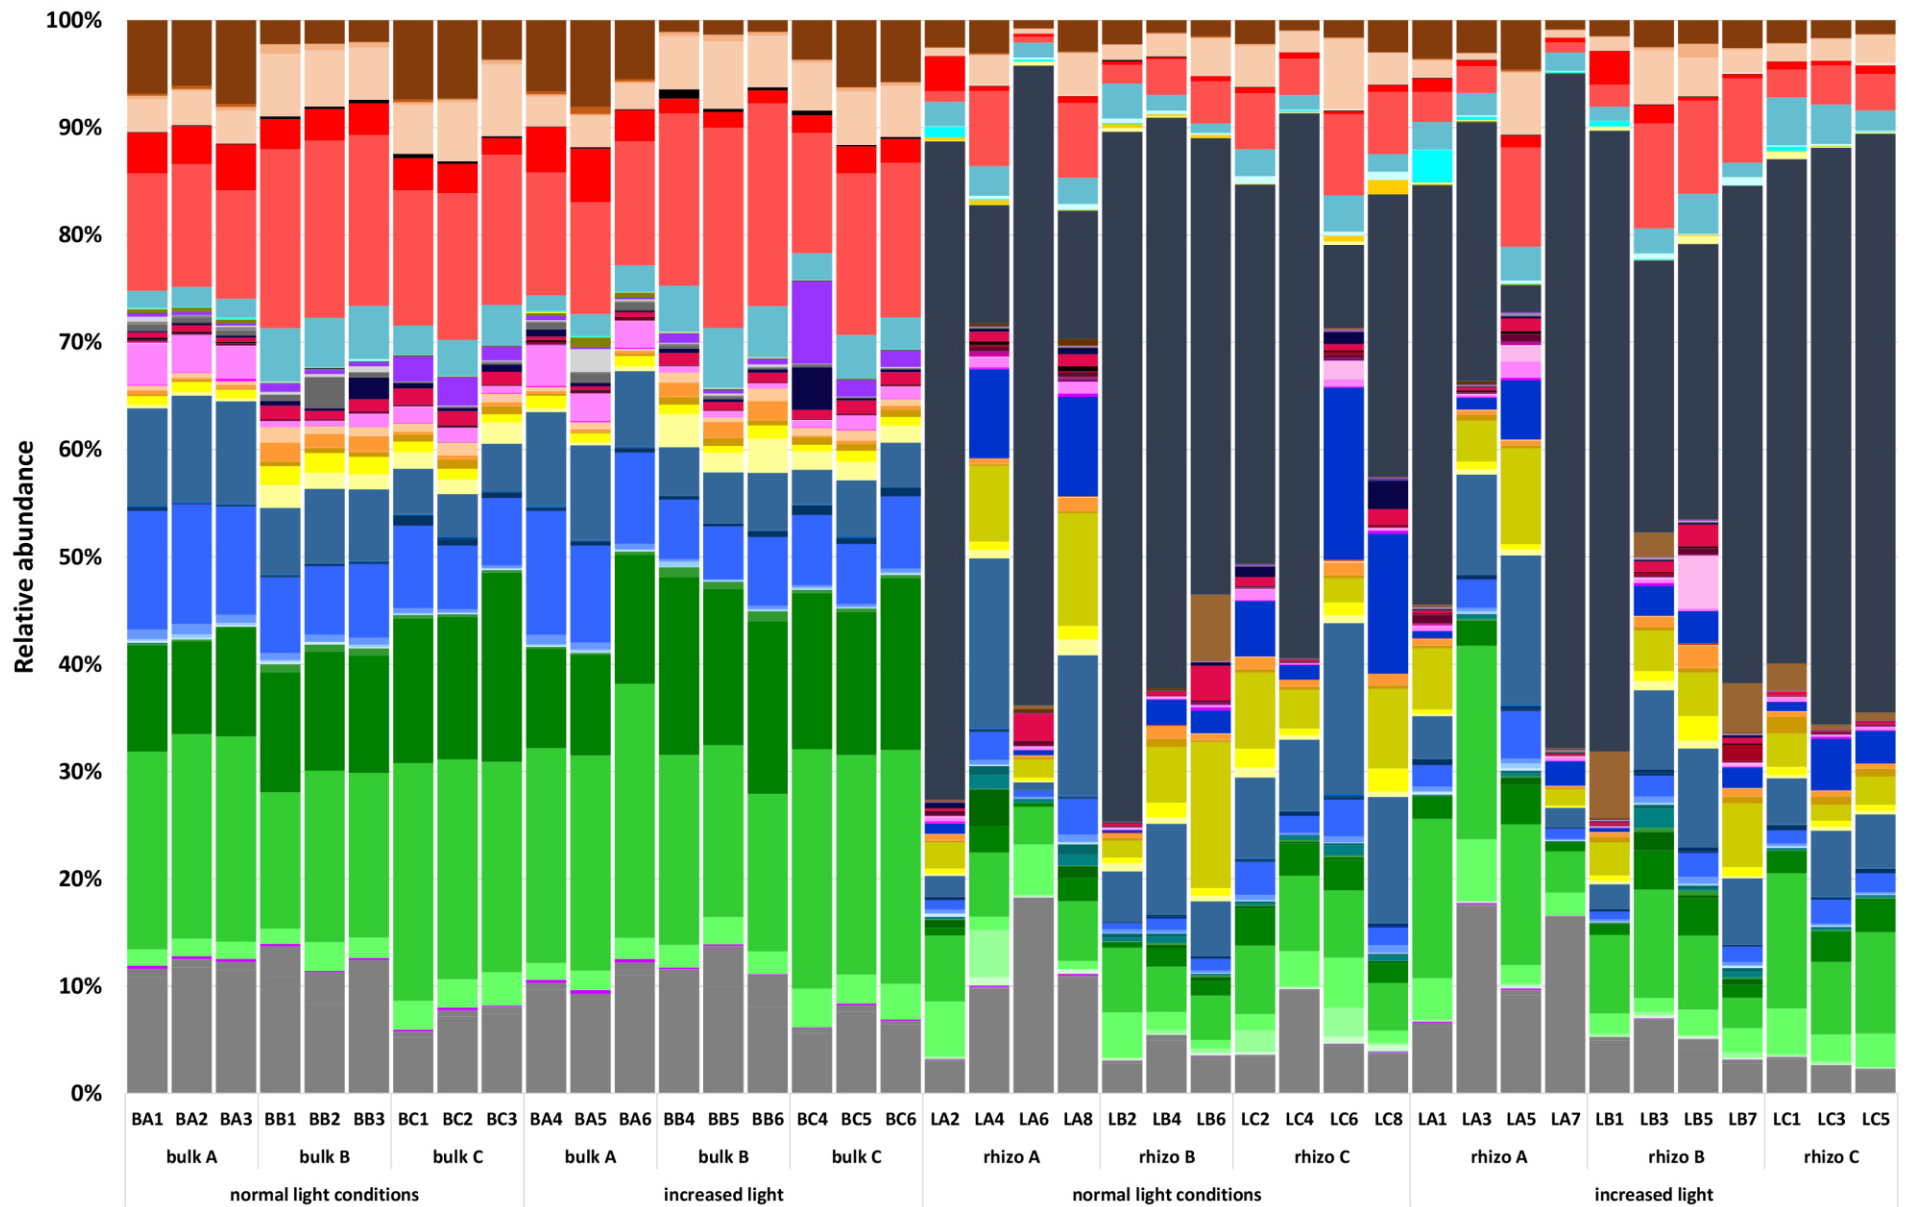

**Figure S3:** Community composition of fungi on genus level representing most abundant genera (99% of relative abundance) in bulk and rhizosphere (rhizo) soils at normal and increased light conditions. A,B,C represent the replicate forest sites. BA, BB, BC stand for bulk soils on site replicate A, B and C. LA, LB, LC stand for rhizosphere soil of *L. decidua* (L) on site replicate A, B and C. LB8 and LC7 were excluded for the description of the fungal community composition as the samples did not meet the quality requirements.

| Phylum                            | Class                              | Order                      | Family                                          | Genus                                        |                                |                                  |                               |
|-----------------------------------|------------------------------------|----------------------------|-------------------------------------------------|----------------------------------------------|--------------------------------|----------------------------------|-------------------------------|
| <b>Zygomycota</b>                 | Zygomycota class Incertae sedis    | Mucorales                  | Umbelopsidaceae                                 | <i>Umbelopsis</i> spp.                       |                                |                                  |                               |
|                                   |                                    |                            | Mucoraceae                                      | <i>Mucor</i> spp.<br>Mucoraceae unclassified |                                |                                  |                               |
|                                   |                                    | Mortierellales             | Mortierellaceae                                 | <i>Mortierella</i> spp.                      |                                |                                  |                               |
|                                   |                                    | Kickxellales               | Kickxellaceae                                   | <i>Ramicandelaber</i> spp.                   |                                |                                  |                               |
| <b>Basidiomycota</b>              | Basidiomycota unclassified         | Basidiomycota unclassified | Basidiomycota unclassified                      | Basidiomycota unclassified                   |                                |                                  |                               |
|                                   |                                    |                            | Wallemiomycetes                                 | Geminibasidiales                             | Geminibasidiaceae              | <i>Geminibasidium</i> spp.       |                               |
|                                   | Tremellomycetes                    | Filobasidiales             | Filobasidiaceae                                 | <i>Cryptococcus</i> spp.                     |                                |                                  |                               |
|                                   | Microbotryomycetes                 | Sporidiobolales            | unclassified Sporidiobolales                    | unclassified Sporidiobolales                 |                                |                                  |                               |
|                                   |                                    |                            | Sporidiobolales family Incertae sedis           | <i>Rhodotorula</i> spp.                      |                                |                                  |                               |
|                                   | Agaricostilbomycetes               | Agaricostilbales           | Chionosphaeraceae                               | <i>Kurtzmanomyces</i> spp.                   |                                |                                  |                               |
|                                   |                                    |                            | Trechisporales                                  | unclassified Trechisporales                  | unclassified Trechisporales    |                                  |                               |
|                                   |                                    |                            | Thelephorales                                   | Hydnodontaceae                               | <i>Trechispora</i> spp.        |                                  |                               |
|                                   |                                    |                            |                                                 | Thelephoraceae                               | <i>Tomentella</i> spp.         |                                  |                               |
|                                   |                                    |                            |                                                 | Sebacinales                                  | Sebacinaceae unclassified      |                                  |                               |
|                                   |                                    |                            | Boletales                                       | Suillaceae                                   | <i>Suillus</i> spp.            |                                  |                               |
|                                   |                                    |                            |                                                 | Gomphidiaceae                                | unclassified Gomphidiaceae     |                                  |                               |
|                                   |                                    |                            | Auriculariales                                  | unclassified Auriculariales                  | unclassified Auriculariales    |                                  |                               |
|                                   |                                    |                            |                                                 | Agaricales                                   | Agaricales unclassified        | Agaricales unclassified          |                               |
|                                   |                                    |                            |                                                 |                                              |                                | Tricholomataceae                 | unclassified Tricholomataceae |
|                                   |                                    |                            |                                                 |                                              |                                | Mycenaceae                       | Mycenaceae unclassified       |
|                                   |                                    |                            |                                                 |                                              |                                | Inocybaceae                      | <i>Inocybe</i> spp.           |
|                                   |                                    |                            |                                                 |                                              |                                | Hygrophoraceae                   | <i>Hygrocybe</i> spp.         |
|                                   |                                    |                            |                                                 | Agaricaceae                                  | <i>Echinoderma</i> spp.        |                                  |                               |
|                                   |                                    |                            |                                                 | Agaricomycetes unclassified                  | Agaricomycetes unclassified    |                                  |                               |
|                                   | <b>Ascomycota</b>                  | Ascomycota unclassified    | Ascomycota unclassified                         | Ascomycota unclassified                      | Ascomycota unclassified        |                                  |                               |
|                                   |                                    |                            |                                                 | Xylariales                                   | Hyponectriaceae                | unclassified Hyponectriaceae     |                               |
|                                   |                                    |                            |                                                 | Amphisphaeriaceae                            | unclassified Amphisphaeriaceae |                                  |                               |
| Sordariales unclassified          |                                    |                            |                                                 | Sordariales unclassified                     |                                |                                  |                               |
| Hypocreales unclassified          |                                    |                            |                                                 | Hypocreales unclassified                     | Hypocreales unclassified       | Hypocreales unclassified         |                               |
|                                   |                                    |                            |                                                 |                                              | <i>Stachybotrys</i> spp.       |                                  |                               |
| Hypocreales family Incertae sedis |                                    |                            |                                                 | Hypocreales family Incertae sedis            | <i>Ilyonectria</i> spp.        |                                  |                               |
|                                   |                                    |                            |                                                 |                                              | <i>Acremonium</i> spp.         |                                  |                               |
|                                   |                                    |                            |                                                 |                                              |                                | <i>Hypocrea</i> spp.             |                               |
|                                   |                                    |                            |                                                 |                                              |                                | Hypocreaceae unclassified        |                               |
|                                   |                                    |                            |                                                 |                                              |                                | Cordycipitaceae unclassified     |                               |
|                                   |                                    |                            |                                                 |                                              |                                | Cordycipitaceae                  | <i>Metarhizium</i> spp.       |
| Pezizomycetes                     |                                    |                            |                                                 | Pezizales                                    | Pyronemataceae                 | <i>Wilcoxina</i> spp.            |                               |
|                                   | Leotiomycetes order Incertae sedis | <i>Meliniomyces</i> spp.   |                                                 |                                              |                                |                                  |                               |
|                                   |                                    |                            | <i>Leohumicola</i> spp.                         |                                              |                                |                                  |                               |
|                                   |                                    |                            | Helotiales unclassified                         | Helotiales unclassified                      |                                |                                  |                               |
|                                   |                                    |                            | Leotiomycetes unclassified                      | <i>Leptodontidium</i> spp.                   |                                |                                  |                               |
|                                   |                                    |                            | Eurotiales                                      | Eurotiales                                   | Dermateaceae unclassified      | <i>Cadophora</i> spp.            |                               |
|                                   |                                    |                            |                                                 |                                              | Leotiomycetes unclassified     | Dermateaceae unclassified        |                               |
|                                   |                                    |                            |                                                 |                                              |                                | Trichocomaceae unclassified      |                               |
|                                   |                                    |                            |                                                 |                                              |                                | <i>Penicillium</i> spp.          |                               |
|                                   |                                    |                            |                                                 |                                              |                                | <i>Paecilomyces</i> spp.         |                               |
|                                   |                                    |                            |                                                 |                                              |                                | Chaetothyriales unclassified     | Chaetothyriales unclassified  |
|                                   |                                    |                            |                                                 |                                              |                                | <i>Exophiala</i> spp.            |                               |
|                                   |                                    |                            |                                                 |                                              |                                | Herpotrichiellaceae unclassified | <i>Cladophialophora</i> spp.  |
|                                   |                                    |                            | Herpotrichiellaceae unclassified                |                                              |                                |                                  |                               |
|                                   |                                    |                            | Eurotiomycetes unclassified                     | Eurotiomycetes unclassified                  |                                |                                  |                               |
|                                   |                                    |                            | <i>Phoma</i> spp.                               |                                              |                                |                                  |                               |
|                                   |                                    |                            | Pleosporales family Incertae sedis unclassified |                                              |                                |                                  |                               |
|                                   |                                    |                            | Pleomassariaceae unclassified                   |                                              |                                |                                  |                               |
|                                   |                                    |                            | <i>Cenococcum</i> spp.                          |                                              |                                |                                  |                               |
|                                   |                                    |                            | unclassified Pseudeurotiaceae                   |                                              |                                |                                  |                               |
|                                   |                                    |                            | <i>Oidiodendron</i> spp.                        |                                              |                                |                                  |                               |
|                                   |                                    |                            | Myxotrichaceae unclassified                     |                                              |                                |                                  |                               |
|                                   |                                    |                            | <i>Aureobasidium</i> spp.                       |                                              |                                |                                  |                               |
|                                   |                                    |                            | Davidiellaceae unclassified                     |                                              |                                |                                  |                               |
|                                   |                                    |                            | <i>Tetrachaetum</i> spp.                        |                                              |                                |                                  |                               |
|                                   |                                    |                            | <i>Chalara</i> spp.                             |                                              |                                |                                  |                               |
|                                   |                                    |                            | Ascomycota class Incertae sedis                 | Ascomycota family Incertae sedis             |                                |                                  |                               |
| <b>Fungi unclassified</b>         | Fungi unclassified                 | Fungi unclassified         | Fungi unclassified                              | Fungi unclassified                           |                                |                                  |                               |

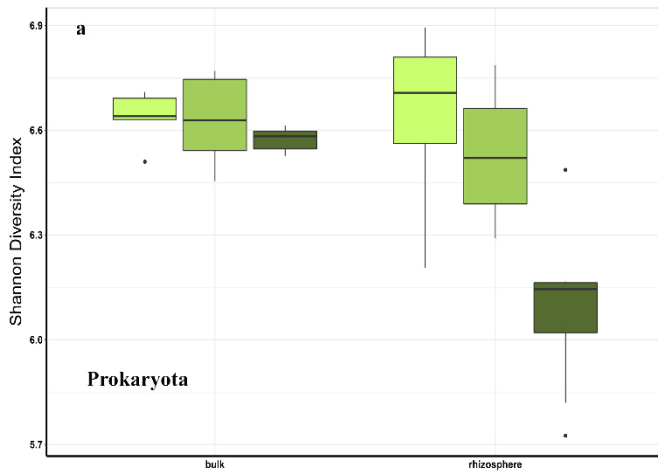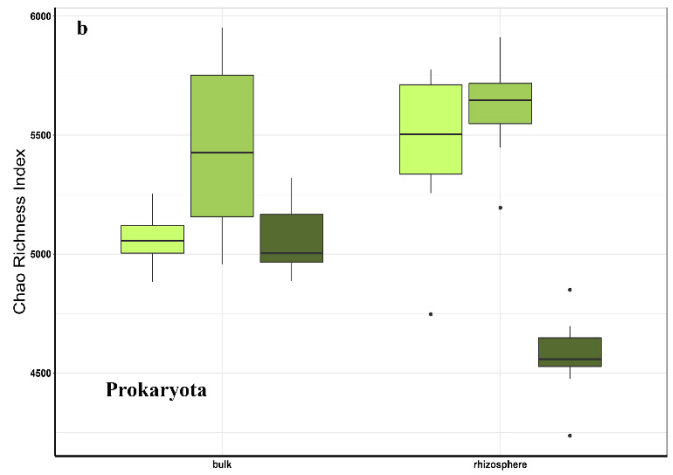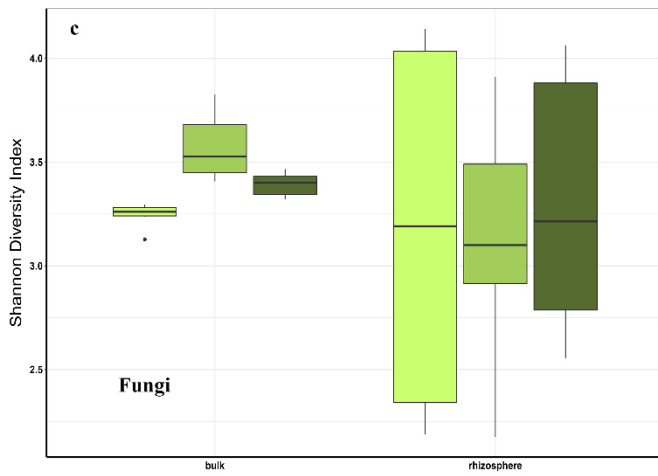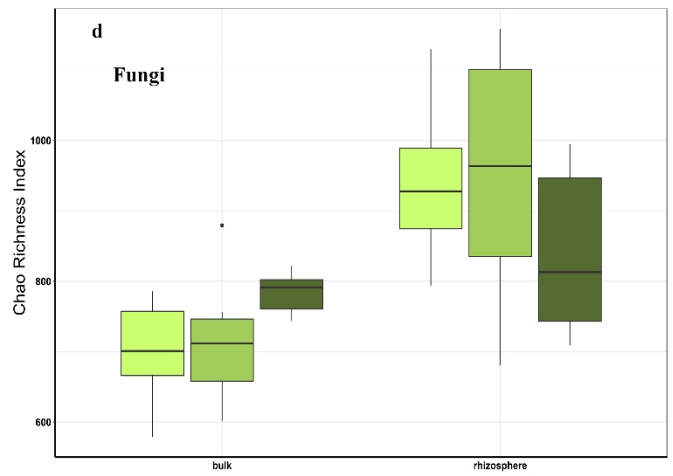

**Figure S4:** Shannon–Wiener Diversity Index ( $H'$ ) (a) and Chao Richness Index (b) of prokaryotic communities and Shannon–Wiener Diversity Index ( $H'$ ) (c) and Chao Richness Index (d) of fungal communities in all bulk and rhizosphere soils of *Larix decidua* (L). The different green colors refer to the replicate sites (A, B, C) in the forest. Boxes represent 25–75% of values, black lines medians ( $n = 3$ ), and whiskers 1.5 interquartile ranges.

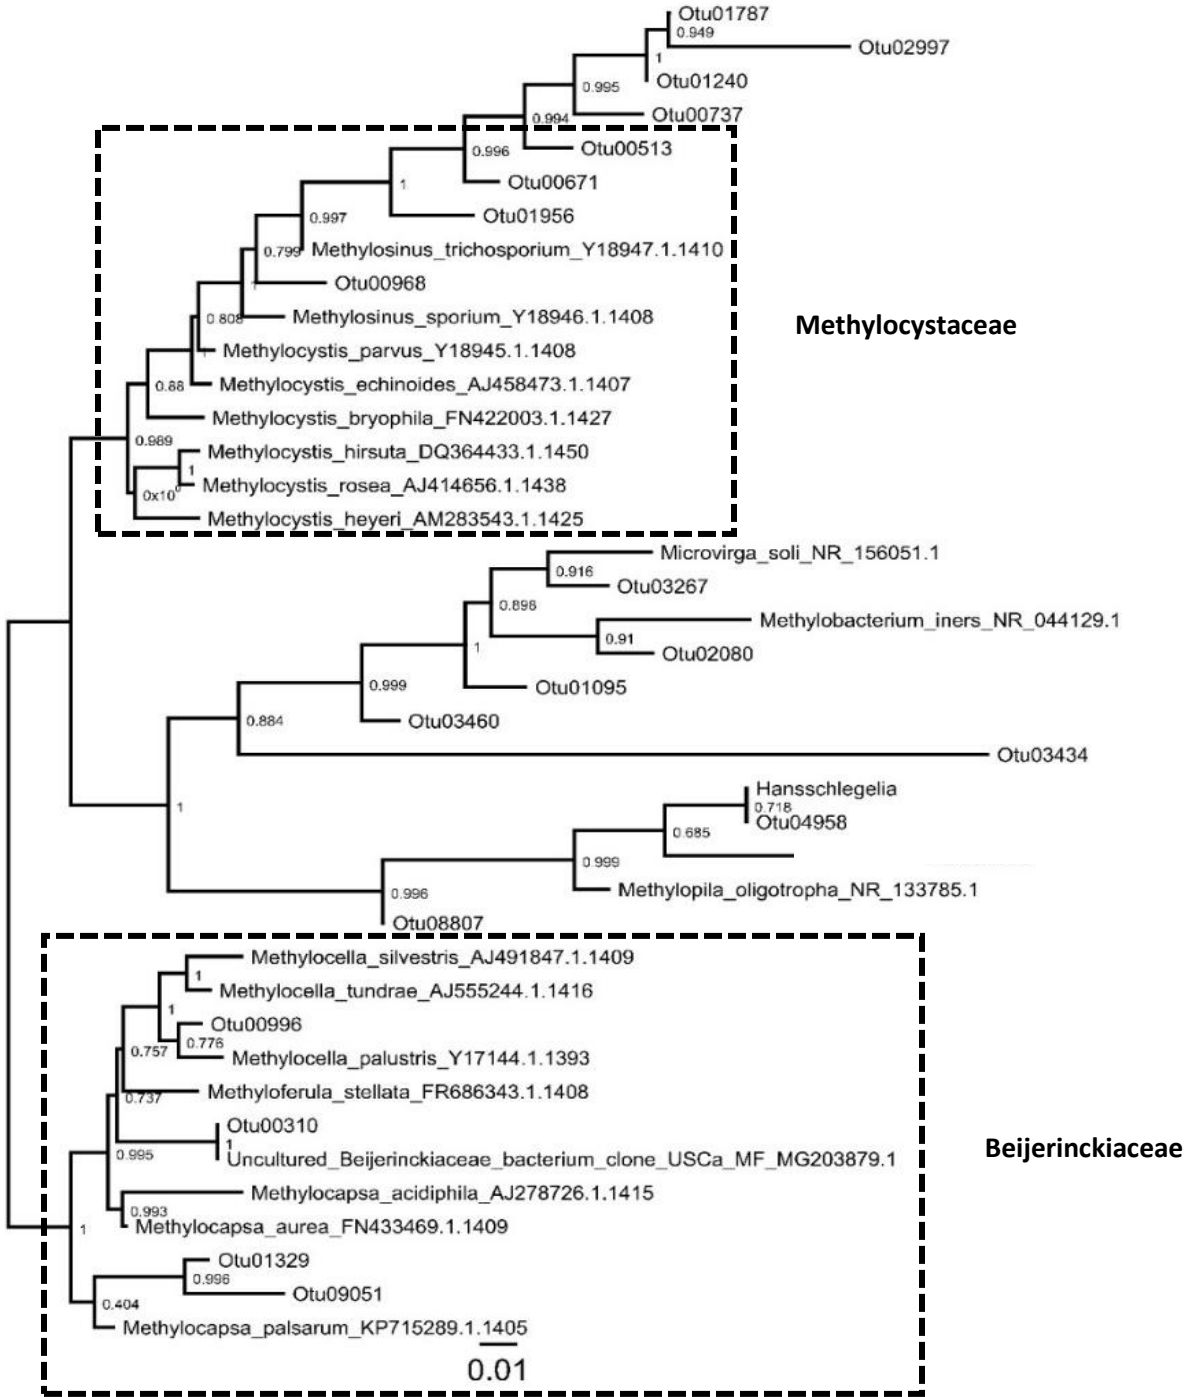

**Figure S5:** Unrooted Maximum likelihood tree (PhyML) showing the relationship between selected OTUs that were classified as ‘Rhizobiales unclassified’ as the highest taxonomic resolution and selected reference methanotrophs (and methylotrophic species) within Alphaproteobacteria known from the literature and a reconstructed draft genome of the uncultivated upland soil cluster  $\alpha$  (USC $\alpha$ ) methanotroph (Pratscher et al., 2018). The scale bar represents 1% nucleotide substitution per site and numbers at nodes of the tree indicate Chi2 values.



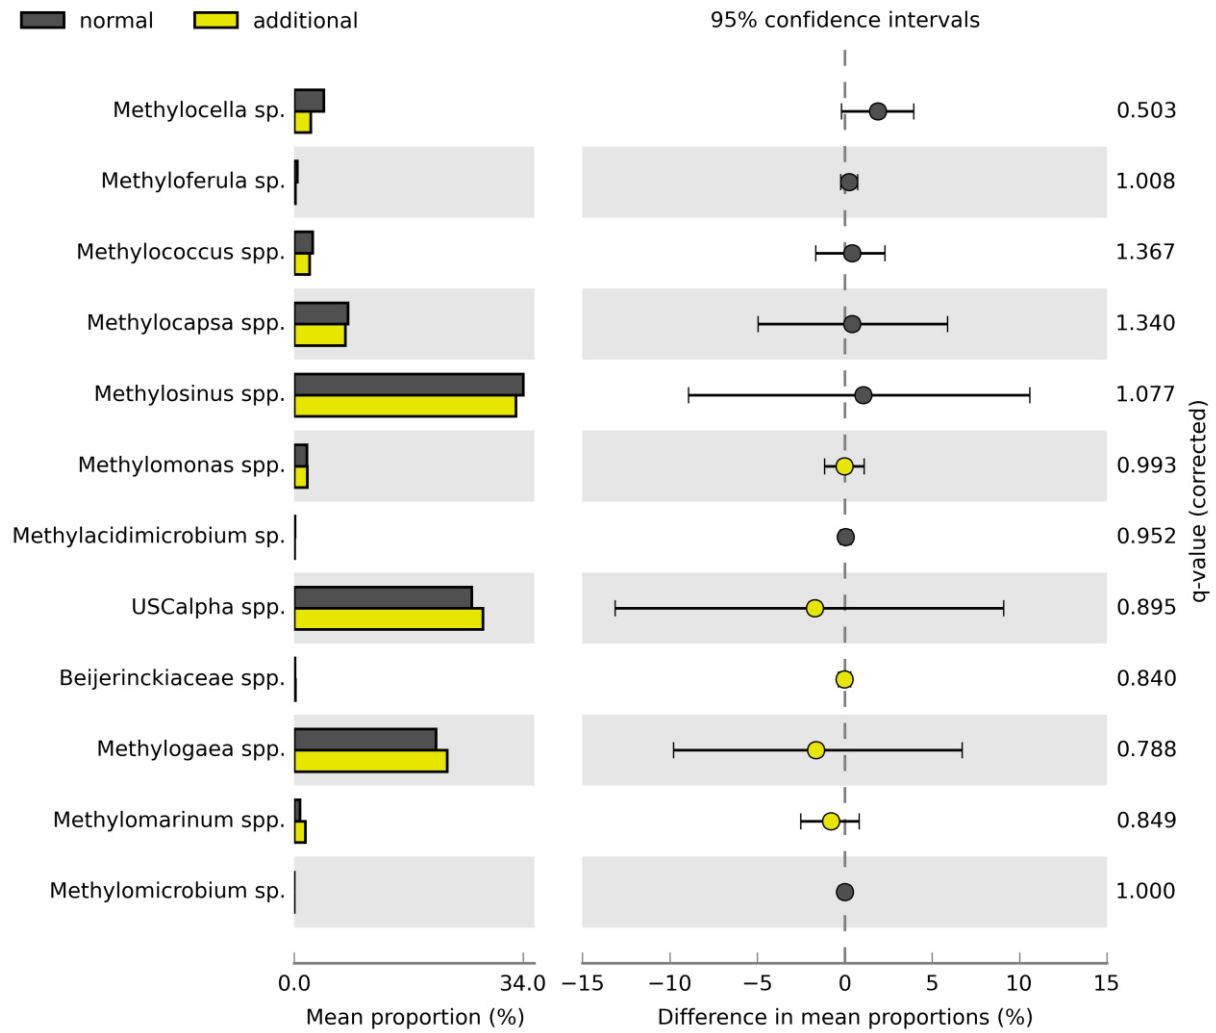

**Figure S6:** Extended error bar plot showing mean proportions [%] of methanotrophic genera in rhizosphere soils of *L. decidua* and the respective differences in mean proportions [%] according to normal (grey) and additional (yellow) light conditions. q-values are adjusted p-values following Benjamini-Hochberg method for multiple test correction.

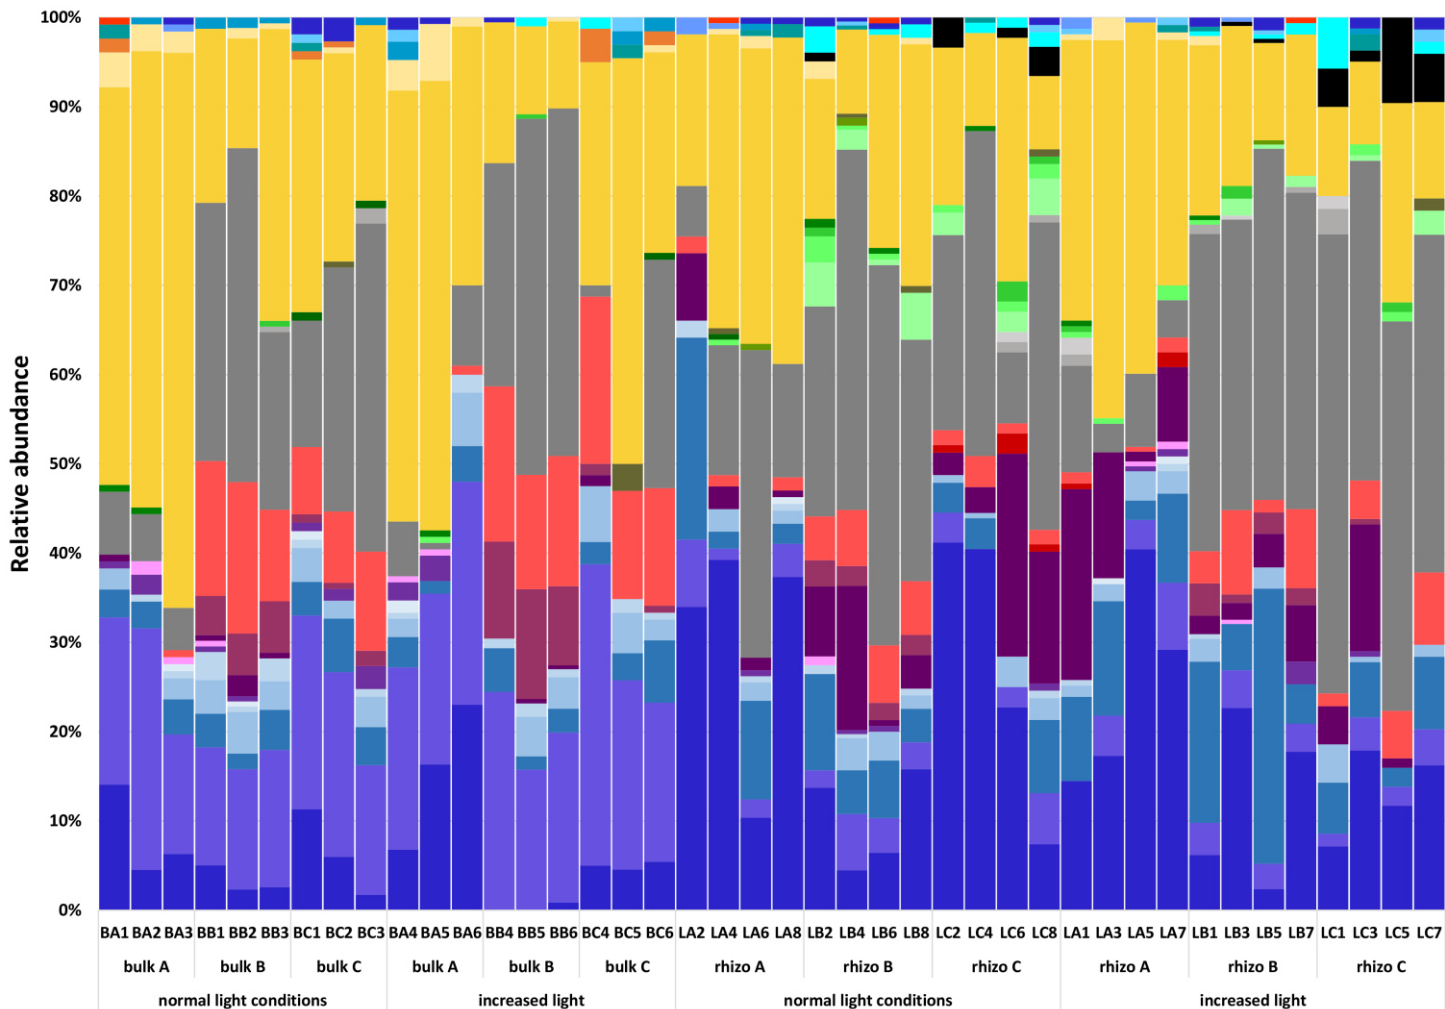

| Order           | Family                       | Genus                                      | Order       | Family           | Genus                                    |
|-----------------|------------------------------|--------------------------------------------|-------------|------------------|------------------------------------------|
| Verrucomicrobia | unclassified Verrucomicrobia | <i>Methylacidimicrobium</i> sp. (Otu08201) | Rhizobiales | Beijerinckiaceae | USCα Beijerinckiaceae cluster (Otu06160) |
| Methylococales  | Methylococcaceae             | <i>Methylomonas</i> sp. (Otu03260)         |             |                  | USCα Beijerinckiaceae cluster (Otu04834) |
|                 |                              | <i>Methylomonas</i> sp. (Otu07875)         |             |                  | USCα Beijerinckiaceae cluster (Otu00310) |
|                 |                              | <i>Methylomonas</i> sp. (Otu06015)         |             |                  | <i>Methylotella</i> sp. (Otu00996)       |
|                 |                              | <i>Methylomonas</i> sp. (Otu04993)         |             |                  | <i>Methylocapsa</i> sp. (Otu09051)       |
|                 |                              | <i>Methylomonas</i> sp. (Otu04444)         |             |                  | <i>Methylocapsa</i> sp. (Otu01445)       |
|                 |                              | <i>Methylomonas</i> sp. (Otu03413)         |             |                  | <i>Methylocapsa</i> sp. (Otu01329)       |
|                 |                              | <i>Methylomicrobium</i> sp. (Otu06027)     |             |                  | Beijerinckiaceae (Otu07689)              |
|                 |                              | <i>Methylomarinum</i> sp. (Otu03685)       |             |                  | <i>Methyloferula</i> sp. (Otu04528)      |
|                 |                              | <i>Methylogaea</i> sp. (Otu02547)          |             | Methylocystaceae | <i>Methylosinus</i> sp. (Otu06414)       |
|                 |                              | <i>Methylogaea</i> sp. (Otu00163)          |             |                  | <i>Methylosinus</i> sp. (Otu02756)       |
|                 |                              | <i>Methylococcus</i> sp. (Otu12861)        |             |                  | <i>Methylosinus</i> sp. (Otu01956)       |
|                 |                              | <i>Methylococcus</i> sp. (Otu07827)        |             |                  | <i>Methylosinus</i> sp. (Otu00968)       |
|                 |                              | <i>Methylococcus</i> sp. (Otu07764)        |             |                  | <i>Methylosinus</i> sp. (Otu00671)       |
|                 |                              | <i>Methylococcus</i> sp. (Otu07643)        |             |                  | <i>Methylosinus</i> sp. (Otu00513)       |
|                 |                              | <i>Methylococcus</i> sp. (Otu07070)        |             |                  |                                          |
|                 |                              | <i>Methylococcus</i> sp. (Otu05641)        |             |                  |                                          |
|                 |                              | <i>Methylococcus</i> sp. (Otu03759)        |             |                  |                                          |
|                 |                              | <i>Methylococcus</i> sp. (Otu02779)        |             |                  |                                          |

**Figure S7:** Community composition of methanotrophs on OTU level in bulk and rhizosphere (rhizo) soils at normal and increased light conditions. A,B,C represent the replicate forest sites. BA, BB, BC stand for bulk soils on site replicate A, B and C. LA, LB, LC stand for rhizosphere soil of *L. decidua* (L) on site replicate A, B and C. OTU, operational taxonomic unit.

**Table S1:** Prokaryotic and fungal community description with dominant phyla, classes, orders and families including the respective relative abundances [%] both, in bulk and rhizosphere soils. Significant differences regarding dominant phyla, classes, families and species are indicated in blue (bulk) and red (rhizosphere). Black colors point to no significant differences between bulk and rhizosphere soils. 1) Abundances are given in the order: bulk, rhizosphere, 2) Significant differences regarding dominant phyla, classes, families and species are indicated in blue (bulk) and red (rhizosphere). Black colors point to no significant differences between bulk and rhizosphere soils.

| Domain or kingdom      | dominant phyla              | relative abundance [%] <sup>1, 2)</sup> | dominant class           | class abundance [%] <sup>1, 2)</sup> | dominant order           | order abundance [%] <sup>1, 2)</sup> | dominant family <sup>2)</sup>                    | dominant or exclusive species <sup>2)</sup>               |                                       |                               |
|------------------------|-----------------------------|-----------------------------------------|--------------------------|--------------------------------------|--------------------------|--------------------------------------|--------------------------------------------------|-----------------------------------------------------------|---------------------------------------|-------------------------------|
| <b>Bacteria</b>        | <b>Proteobacteria</b>       | <b>34, 37.3</b>                         | $\alpha$ -Proteobacteria | 17, 18                               | Rhizobiales              | 9.9, 10.1                            | Bradyrhizobiaceae                                | <i>Bradyrhizobium</i> sp.                                 |                                       |                               |
|                        |                             |                                         |                          |                                      |                          |                                      | Hyphomicrobiaceae                                | <i>Pedomicrobium</i> sp.                                  |                                       |                               |
|                        |                             |                                         |                          |                                      |                          |                                      | Rhizobiaceae                                     | <i>Rhizobium</i> sp.                                      |                                       |                               |
|                        |                             |                                         |                          |                                      |                          |                                      | Rhodospirillales                                 | 3.7, 3.8                                                  | Acetobacteriaceae                     | <i>Acidocella</i> sp.         |
|                        |                             |                                         |                          |                                      |                          |                                      | Rhodospirillaceae                                | <i>Inquillus</i> sp.                                      |                                       |                               |
|                        |                             |                                         |                          |                                      |                          |                                      | Sphingomonadales                                 | 1.3, 2.3                                                  | Erythrobacteraceae, Sphingomonadaceae | <i>Altererythrobacter</i> sp. |
|                        |                             |                                         | $\beta$ -Proteobacteria  | 8, 10                                | Burkholderiales          | 1.9, 6.5                             | Burkholderiaceae                                 | <i>Burkholderia</i> sp.                                   |                                       |                               |
|                        |                             |                                         |                          |                                      |                          |                                      | Comamonadaceae                                   |                                                           |                                       |                               |
|                        |                             |                                         |                          |                                      |                          |                                      | Oxalobacteraceae                                 |                                                           |                                       |                               |
|                        |                             |                                         | $\gamma$ -Proteobacteria | 3.6, 5.4                             | Xanthomonadales          | 1.4, 3.4                             | Xanthomonadaceae                                 | <i>Rhodanobacter</i> sp.,<br><i>Pseudoxanthomonas</i> sp. |                                       |                               |
|                        |                             |                                         |                          |                                      |                          |                                      | Sinobacteraceae                                  | <i>Steroidobacter</i> sp.                                 |                                       |                               |
|                        |                             |                                         | <b>Acidobacteria</b>     | <b>22.2, 11.6</b>                    | $\delta$ -Proteobacteria | 3.5, 2.4                             | Myxococcales                                     | 2.3, 1.5                                                  | Acidobacteria_Gp6                     | 10.6, 3.9                     |
|                        |                             |                                         |                          |                                      |                          |                                      |                                                  |                                                           | Acidobacteria_Gp4                     | 2.6, 0.9                      |
|                        |                             |                                         |                          |                                      |                          |                                      |                                                  |                                                           | Acidobacteria_Gp1                     | 0.1, 2.3                      |
| Acidobacteria_Gp16     | 1.8, 0.6                    |                                         |                          |                                      |                          |                                      |                                                  |                                                           |                                       |                               |
| Acidobacteria_Gp17     | 1.7, 0.4                    |                                         |                          |                                      |                          |                                      |                                                  |                                                           |                                       |                               |
| Bacteria unclassified  | 15.1, 8.8                   | Bacteria unclassified                   |                          |                                      |                          |                                      |                                                  |                                                           | 15, 9                                 |                               |
| <b>Actinobacteria</b>  | <b>9.8, 11.0</b>            | Actinobacteria                          | 9, 10.6                  | Actinomycetales                      | 4.2, 8.2                 | Streptomycetaceae                    | <i>Streptomyces</i> sp.                          |                                                           |                                       |                               |
|                        |                             |                                         |                          |                                      |                          | Mycobacteriaceae                     | <i>Mycobacterium</i> sp.                         |                                                           |                                       |                               |
|                        |                             |                                         |                          |                                      |                          | Micromonosporaceae                   | <i>Actinoplanes</i> sp.                          |                                                           |                                       |                               |
|                        |                             |                                         |                          |                                      |                          | Nocardiodaceae                       | <i>Nocardioides</i> sp.,<br><i>Kribbella</i> sp. |                                                           |                                       |                               |
|                        |                             |                                         |                          |                                      |                          | Gaiellales                           | 2.1, 0.8                                         | Gaiellaceae                                               | <i>Gaiella</i> sp.                    |                               |
|                        |                             |                                         |                          |                                      |                          | Acidimicrobiales                     | 1.1, 0.7                                         | Acidimicrobiaceae                                         | <i>Ilumatobacter</i> sp.              |                               |
|                        |                             |                                         |                          |                                      |                          | <b>Bacteroidetes</b>                 | <b>3.6, 10.17</b>                                | Sphingobacteriia                                          | 2, 6                                  | Sphingobacteriales            |
| Sphingobacteriaceae    | <i>Mucilaginibacter</i> sp. |                                         |                          |                                      |                          |                                      |                                                  |                                                           |                                       |                               |
| Cytophagaceae          | <i>Dyadobacter</i> sp.      |                                         |                          |                                      |                          |                                      |                                                  |                                                           |                                       |                               |
| <b>Verrucomicrobia</b> | <b>5.8, 4.6</b>             | Cd. Saccharibacteria                    | 0.7, 2.6                 | Cytophagales                         | 0.7, 2.6                 | Cd. Saccharibacteria                 | 0.3, 10                                          |                                                           |                                       |                               |
|                        |                             |                                         |                          |                                      |                          | Spartobacteria                       | 4.5, 2.4                                         | Spartobacteria unclassified                               | 4.5, 2.4                              |                               |
|                        |                             |                                         | 0.1, 0.5                 | Opitutales                           | 0.1, 0.5                 | Opitutaceae                          | <i>Opitutus</i> sp.                              |                                                           |                                       |                               |
|                        |                             |                                         | 0.9, 1.1                 | Subdivision3                         | 0.9, 1.1                 |                                      |                                                  |                                                           |                                       |                               |

|                |                                 |                   |                                       |                   |                                         |                   |                                                                                             |
|----------------|---------------------------------|-------------------|---------------------------------------|-------------------|-----------------------------------------|-------------------|---------------------------------------------------------------------------------------------|
|                |                                 |                   |                                       | unclassified      |                                         |                   |                                                                                             |
|                | <b>Planctomycetes</b>           | <b>5.7, 3.2</b>   | Planctomycetia                        | <b>5.7, 3.2</b>   | Planctomycetales                        | <b>5.7, 3.2</b>   | Planctomycetaceae<br><i>Singulisphaera sp.</i> ,<br><i>Pirellula sp.</i>                    |
|                | <b>Firmicutes</b>               | <b>0.8, 0.7</b>   | Bacilli                               | 0.8, 0.7          | Bacillales                              | 0.8, 0.7          |                                                                                             |
|                | <b>Gemmatimonadetes</b>         | <b>0.8, 0.6</b>   | Gemmatimonadetes                      | 0.8, 0.6          | Gemmatimonadales                        | 0.8, 0.6          |                                                                                             |
|                | <b>Chloroflexi</b>              | <b>0.5, 0.8</b>   | Ktedonobacteria                       | <b>0.1, 0.5</b>   | Ktedonobacterales                       | <b>0.1, 0.5</b>   |                                                                                             |
|                | <b>candidate_division WPS-1</b> | <b>0.5, 0.5</b>   | candidate_division WPS-1 unclassified | 0.5, 0.5          |                                         |                   |                                                                                             |
|                | <b>Armatimonadetes</b>          | <b>0.2, 0.4</b>   | Armatimonadia                         | 0.2, 0.4          |                                         |                   |                                                                                             |
| <b>Archaea</b> | <b>Thaumarchaeota</b>           | <b>0.03, 0.06</b> | Nitrososphaerales                     | 0.03, 0.06        | Nitrososphaeria                         | 0.01, 0.03        | Nitrososphaeraceae                                                                          |
|                | <b>Euryarchaeota</b>            | <b>0.02, 0.02</b> |                                       |                   |                                         |                   |                                                                                             |
| <b>Fungi</b>   | <b>Ascomycota</b>               | <b>56.5, 38.9</b> | Dothideomycetes                       | <b>33.5, 15.0</b> | Dothideomycetes<br>order incertae sedis | <b>33, 12</b>     | <b>Myxotrichaceae</b><br><i>Oidiodendron sp.</i>                                            |
|                |                                 |                   |                                       |                   |                                         |                   | <b>Pseudeurotiaceae</b>                                                                     |
|                |                                 |                   |                                       |                   | Pleosporales                            | <b>0.5, 1.35</b>  | <b>Pleosporales family incertae sedis</b><br><i>Phoma sp.</i> ,<br><i>Setomelanomma sp.</i> |
|                |                                 |                   |                                       |                   |                                         |                   | <b>Pleomassariaceae</b>                                                                     |
|                |                                 |                   |                                       |                   | Dothideales                             | <b>0, 0.7</b>     | <b>Dothioraceae</b><br><i>Aureobasidium sp.</i>                                             |
|                |                                 |                   |                                       |                   | Capnodiales                             | <b>0.05, 0.3</b>  | <b>Davidiellaceae</b>                                                                       |
|                |                                 |                   |                                       |                   | Hysteriales                             | <b>0.01, 0.5</b>  | <b>Gloniaceae</b><br><i>Cenococcum sp.</i>                                                  |
|                |                                 |                   | Eurotiomycetes                        | <b>15, 10.6</b>   | Eurotiales                              | 6.6, 7.5          | Trichocomaceae<br><i>Penicillium sp.</i>                                                    |
|                |                                 |                   |                                       |                   | Chaetothyriales                         | <b>8.3, 2.5</b>   | <b>Herpotrichiellaceae</b><br><i>Exophiala sp.</i>                                          |
|                |                                 |                   | Leotiomycetes                         | <b>4.6, 7.3</b>   | Helotiales                              | <b>2.5, 6.7</b>   | <b>Helotiales family incertae sedis</b><br><i>Cadophora sp.</i>                             |
|                |                                 |                   | Sordariomycetes                       | 2.3, 2.0          | Hypocreales                             | 2.0, 1.7          | Hypocreaceae                                                                                |
|                |                                 |                   | Pezizomycetes                         | <b>0.01, 3.7</b>  | Pezizales                               | <b>0.01, 3.7</b>  | <b>Pyronemataceae</b><br><i>Wilcoxina sp.</i>                                               |
|                | <b>Basidiomycota</b>            | <b>23.9, 49.4</b> | Agaricomycetes                        | <b>3.7, 40.6</b>  | Boletales                               | <b>0.07, 38.6</b> | <b>Suillaceae</b><br><i>Suillus sp.</i>                                                     |
|                |                                 |                   |                                       |                   | Agaricales                              | <b>2.5, 0.4</b>   | <b>Hygrophoraceae</b><br><i>Hygrocybe sp.</i>                                               |
|                |                                 |                   |                                       |                   | Trechisporales                          |                   |                                                                                             |
|                |                                 |                   | Tremellomycetes                       | <b>13.6, 4.7</b>  | Filobasidiales                          | <b>8.8, 2.6</b>   | <b>Filobasidiaceae</b>                                                                      |
|                |                                 |                   | Tremellomycetes                       |                   | Tremellales                             | <b>4.8, 2.1</b>   | <b>Tremellales family incertae sedis</b><br><i>Cryptococcus sp.</i>                         |
|                |                                 |                   | Microbotryomycetes                    | 3.5, 2.8          | Sporidiobolales                         | 3.3, 2.7          |                                                                                             |
|                |                                 |                   | Wallemiomycetes                       | <b>2.7, 0.8</b>   | Geminibasidiales                        | <b>2.7, 0.8</b>   | <b>Geminibasidiaceae</b><br><i>Geminibasidium sp.</i>                                       |
|                | <b>Zygomycota</b>               | <b>9.5, 5</b>     | Zygomycota class incertae sedis       | <b>9.5, 5.0</b>   | Mortierellales                          | <b>4.4, 2.6</b>   | <b>Mortierellaceae</b><br><i>Mortierella sp.</i>                                            |
|                |                                 |                   |                                       |                   | Mucorales                               | <b>5.1, 2.3</b>   | <b>Umbelopsidaceae</b><br><i>Umbelopsis sp.</i>                                             |

**Table S2:** Site description and physical and chemical soil characteristics of the replicate study sites (soil site) including dry matter content (DM), pH, electrical conductivity (EC), soil organic matter content (OM), dissolved organic carbon (DOC), maximum water holding capacity (MWHC), total carbon (C) and nitrogen (N) content, carbon/nitrogen ratio (C/N), and plant-available ammonium concentration (NH<sub>4</sub><sup>+</sup>-N). Data represent means ± standard deviations (*n* = 3) in italics.

| <i>Soil site</i>                     | <b>Replicate site</b> | <b>DM</b><br>[g g <sup>-1</sup> ] | <b>pH</b>   | <b>EC</b><br>[μS m <sup>-1</sup> ] | <b>OM</b><br>[g g <sup>-1</sup> DM] | <b>DOC</b><br>[μg g <sup>-1</sup> DM] | <b>MWHC</b><br>[g g <sup>-1</sup> DM] | <b>C</b><br>[%] | <b>N</b><br>[%] | <b>C/N</b>  | <b>NH<sub>4</sub><sup>+</sup>-N</b><br>[μg g <sup>-1</sup> DM] |
|--------------------------------------|-----------------------|-----------------------------------|-------------|------------------------------------|-------------------------------------|---------------------------------------|---------------------------------------|-----------------|-----------------|-------------|----------------------------------------------------------------|
| <i>Gschwandtkopf Seefeld/Austria</i> | <b>A</b>              | 0.67                              | 6.86        | 82.67                              | 0.11                                | 135.40                                | 0.98                                  | 5.45            | 0.28            | 19.57       | 5.29                                                           |
|                                      |                       | <i>0.00</i>                       | <i>0.05</i> | <i>3.51</i>                        | <i>0.00</i>                         | <i>19.60</i>                          | <i>0.04</i>                           | <i>0.36</i>     | <i>0.01</i>     | <i>1.52</i> | <i>0.70</i>                                                    |
|                                      | <b>B</b>              | 0.65                              | 6.34        | 103.67                             | 0.11                                | 165.94                                | 1.14                                  | 5.53            | 0.26            | 21.79       | 11.82                                                          |
|                                      |                       | <i>0.00</i>                       | <i>0.05</i> | <i>0.58</i>                        | <i>0.00</i>                         | <i>2.13</i>                           | <i>0.01</i>                           | <i>0.42</i>     | <i>0.01</i>     | <i>2.21</i> | <i>1.20</i>                                                    |
|                                      | <b>C</b>              | 0.71                              | 6.16        | 89.33                              | 0.09                                | 147.36                                | 0.81                                  | 3.95            | 0.18            | 21.99       | 12.51                                                          |
|                                      |                       | <i>0.00</i>                       | <i>0.19</i> | <i>4.62</i>                        | <i>0.00</i>                         | <i>9.11</i>                           | <i>0.01</i>                           | <i>0.32</i>     | <i>0.01</i>     | <i>2.14</i> | <i>1.11</i>                                                    |

## References

Pratscher, J., Dumont, M. G. & Conrad, R. Assimilation of acetate by the putative atmospheric methane oxidizers belonging to the USCα clade. *Environ. Microbiol.* **13**, 2692–2701; 10.1111/j.1462-2920.2011.02537.x (2011).
